# Supplementary material for: AID induces intraclonal diversity and genomic damage in CD86+ chronic lymphocytic leukemia cells
Source: PubMed Central journal article supplement (PMC4276288; doi:10.1002/eji.201344421), 2014-10-18
Supplement: eji0044-3747-sd1.pdf [file eji0044-3747-sd1.pdf]

# European Journal of Immunology

**Supporting Information**

**for**

**DOI 10.1002/eji.201344421**

Michael Huemer, Stefan Rebhandl, Nadja Zaborsky, Franz J. Gassner,  
Stefan Hainzl, Lukas Weiss, Daniel Hebenstreit, Richard Greil  
and Roland Geisberger

**AID induces intraclonal diversity and genomic damage in CD86<sup>+</sup> chronic  
lymphocytic leukemia cells**

## ***Supporting information***

**Supporting information Fig. 1.** Dominant VDJ sequences of IgV-UM #1, 2 and IgV-Mut #3, 4 including all subclonal variations.

**Supporting information Fig. 2. Stability of CD86 expression.** CD86 levels were measured from 11 freshly prepared CLL samples. Aliquots from each sample were frozen at liquid nitrogen and reanalyzed again upon thawing.

**Supporting information Table 1.** patient details

**Supporting Information Table 2.** Primer list

**Supporting information Table 3.** Sequences derived from deep re-sequencing of VDJ and S $\mu$  regions

**Supporting information Table 4.** Comparison of sequences in unsorted and CD86<sup>+</sup> sorted cells with a frequency >0.1%

### IgV-UM #1

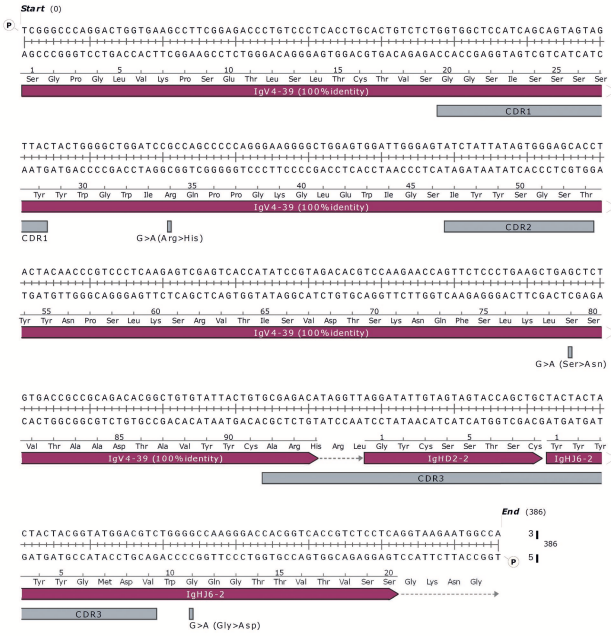

### IgV-Mut #3

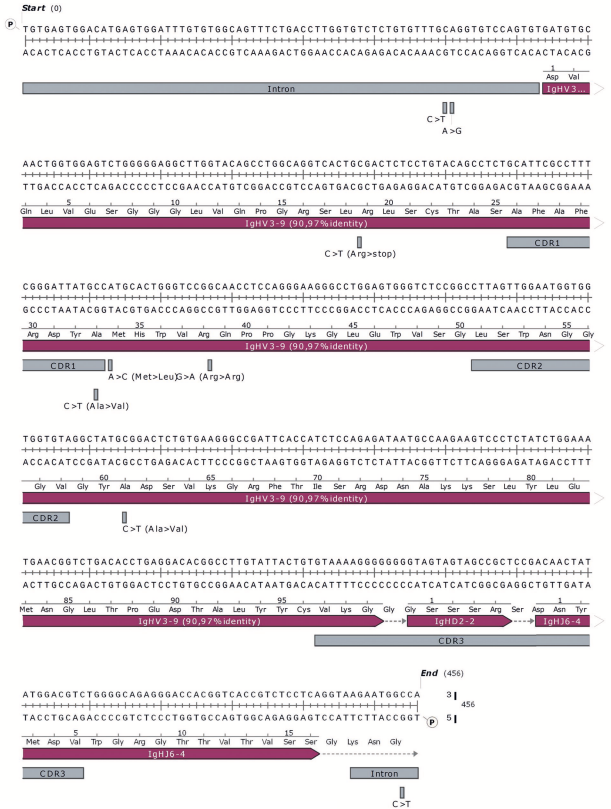

### IgV-UM #2

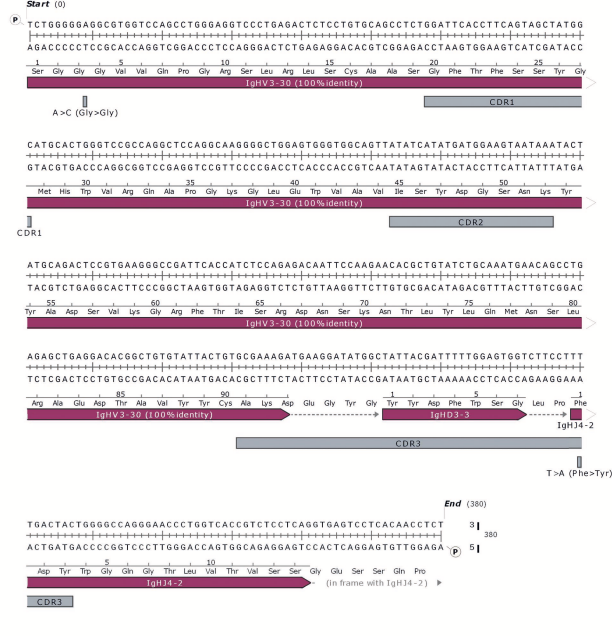

### IgV-Mut #4

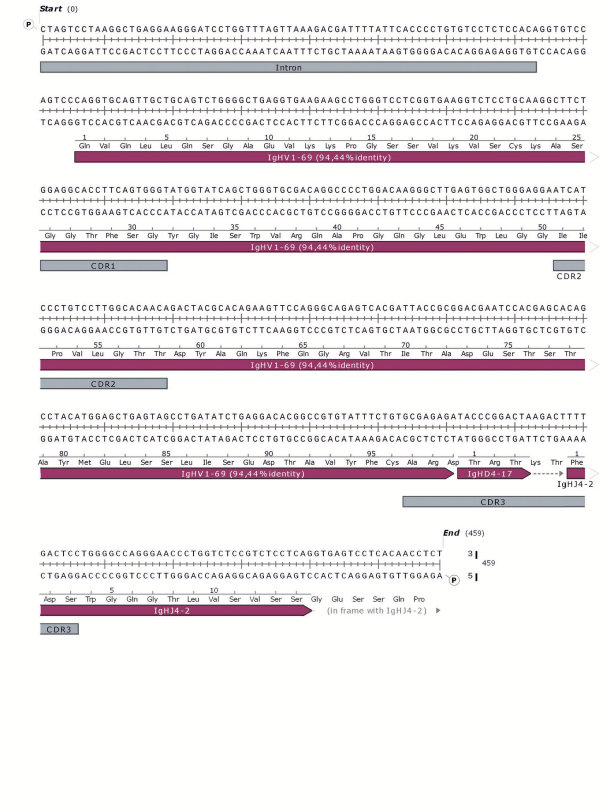

Supporting information Fig. 1. Dominant VDJ sequences of IgV-UM #1, 2 and IgV-Mut #3, 4 including all subclonal variations.

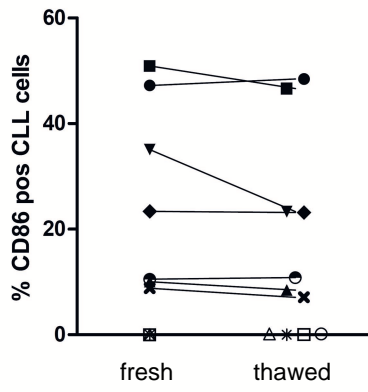

Supporting Information Fig. 2. Stability of CD86 expression. CD86 levels were measured from 11 freshly prepared CLL samples. Aliquots from each sample were frozen at liquid nitrogen and reanalyzed again upon thawing.

## Supporting Information Table 1. Patient details

The following 4 patient samples were subjected to deep sequencing (shown in Fig 1)

|            | Patient ID | Sex | age at diagnosis (years) | Time between diagnosis and sampling (months) | treatment | Rai stage | Mut stat | Zytogen    | Zap70 | CD38 | VLA4 |
|------------|------------|-----|--------------------------|----------------------------------------------|-----------|-----------|----------|------------|-------|------|------|
| IgV-UM #1  | 149        | M   | 68,00                    | 9,00                                         | untreated | 2         | UM       | Tri12      | ↑     | ↑    | ↑    |
| IgV-UM #2  | 337        | M   | 65,00                    | 51,00                                        | treated   | 1         | UM       | del11q 13q | ↓     | ↑    | ↓    |
| IgV-Mut #3 | 154        | M   | 69,00                    | 62,00                                        | treated   | 2         | M        | del13q     | ↓     | ↓    | n.d. |
| IgV-Mut #4 | 283        | M   | 57,00                    | 52,00                                        | treated   | 2         | M        | del11q     | ↑     | ↓    | ↓    |



Supplementary table T1 (patient details)

patients included in time to first treatment statistics (Fig 5 and table 1)  
n.d.=not determined

| Patient ID | Sex | age at diagnosis (years) | Time between diagnosis and sampling (months) | treatment | time to first treatment (months) | Rai stage | Mut stat | Zytogen          | Zap70 | CD38 | VLA  | CD86+ (%) |
|------------|-----|--------------------------|----------------------------------------------|-----------|----------------------------------|-----------|----------|------------------|-------|------|------|-----------|
| 6          | F   | 52,00                    | 36,00                                        | treated   | 43,4                             | 2         | M        | del11q Tri12     | ↓     | ↓    | ↑    | 4,27      |
| 16         | F   | 74,00                    | 55,00                                        | treated   | 77,0                             | 1         | UM       | Tri12            | ↑     | ↑    | ↑    | 0,89      |
| 40         | M   | 64,00                    | 126,00                                       | treated   | 138,0                            | 1         | M        | del13q           | ↓     | ↓    | n.d. | 4,85      |
| 72         | M   | 76,00                    | 140,00                                       | untreated | 152,6                            | 0         | n.d.     | del13q           | ↓     | ↓    | ↓    | 1,12      |
| 85         | M   | 53,00                    | 44,00                                        | treated   | 67,9                             | 2         | M        | del13q           | ↓     | ↓    | ↑    | 1,88      |
| 106        | F   | 75,00                    | 89,00                                        | untreated | 102,6                            | 2         | M        | normal           | n.d.  | ↓    | ↓    | 1,66      |
| 109        | F   | 70,00                    | 189,00                                       | untreated | 202,6                            | 1         | M        | Tri12            | ↓     | ↓    | ↑    | 0,46      |
| 116        | F   | 60,00                    | 95,00                                        | untreated | 104,6                            | 1         | M        | del13q           | ↓     | ↓    | n.d. | 1,61      |
| 123        | M   | 63,00                    | 115,00                                       | untreated | 128,6                            | 2         | M        | del13q           | ↓     | ↓    | ↓    | 0,09      |
| 137        | F   | 69,00                    | 142,00                                       | untreated | 154,6                            | 0         | UM       | Tri12            | ↑     | ↑    | ↑    | 0,42      |
| 149        | M   | 68,00                    | 9,00                                         | treated   | 53,8                             | 2         | UM       | Tri12            | ↑     | ↑    | ↑    | 3,91      |
| 151        | M   | 74,00                    | 81,00                                        | untreated | 92,6                             | 1         | M        | del13q           | ↓     | ↓    | ↓    | 1,3       |
| 154        | M   | 69,00                    | 62,00                                        | treated   | 63,7                             | 2         | M        | del13q           | ↓     | ↓    | n.d. | 7,36      |
| 155        | M   | 57,00                    | 24,00                                        | treated   | 25,0                             | 2         | n.d.     | normal           | n.d.  | ↓    | n.d. | 11,9      |
| 157        | F   | 59,00                    | 83,00                                        | untreated | 94,5                             | 1         | M        | del13q           | ↓     | ↓    | ↓    | 15,32     |
| 158        | F   | 68,00                    | 118,00                                       | untreated | 130,7                            | 2         | M        | del13q           | ↓     | ↓    | ↓    | 2,45      |
| 181        | M   | 72,00                    | 23,00                                        | treated   | 70,1                             | 1         | UM       | Tri12            | ↑     | ↓    | ↑    | 0,95      |
| 230        | F   | 70,00                    | 9,00                                         | treated   | 66,0                             | 0         | UM       | del13q           | ↑     | ↑    | ↑    | 1,16      |
| 232        | F   | 79,00                    | 68,00                                        | untreated | 81,6                             | 0         | M        | del13q 17p       | n.d.  | ↓    | n.d. | 1,4       |
| 242        | F   | 56,00                    | 69,00                                        | untreated | 79,6                             | 1         | UM       | del13q           | ↑     | ↓    | ↓    | 0,59      |
| 264        | M   | 69,00                    | 87,00                                        | untreated | 96,7                             | 0         | M        | del13q           | ↑     | ↑    | ↑    | 0,01      |
| 279        | M   | 57,00                    | 63,00                                        | untreated | 75,0                             | 1         | M        | normal           | ↓     | ↓    | ↑    | 7,51      |
| 280        | F   | 74,00                    | 62,00                                        | untreated | 73,8                             | 0         | M        | normal           | n.d.  | ↓    | ↑    | 1,28      |
| 283        | M   | 57,00                    | 52,00                                        | treated   | 51,5                             | 2         | M        | del11q           | ↑     | ↓    | ↓    | 3,01      |
| 289        | M   | 59,00                    | 53,00                                        | untreated | 61,6                             | 0         | UM       | normal           | ↑     | ↑    | n.d. | 0,25      |
| 305        | F   | 65,00                    | 15,00                                        | treated   | 16,0                             | 1         | n.d.     | normal           | ↑     | ↑    | n.d. | 15,7      |
| 309        | M   | 75,00                    | 10,00                                        | treated   | 18,5                             | 3         | UM       | del11q           | n.d.  | ↓    | n.d. | 6,35      |
| 319        | F   | 56,00                    | 69,00                                        | untreated | 82,7                             | 0         | M        | del13q           | ↓     | ↓    | ↓    | 2,98      |
| 321        | M   | 62,00                    | 45,00                                        | treated   | 44,7                             | 4         | UM       | del13q 17p Tri12 | ↑     | ↑    | ↑    | 1,27      |
| 326        | F   | 81,00                    | 3,00                                         | treated   | 22,0                             | 3         | UM       | normal           | ↓     | ↓    | n.d. | 0,86      |
| 353        | M   | 63,00                    | 99,00                                        | treated   | 123,6                            | 2         | M/UM     | normal           | ↑     | ↑    | ↑    | 2,96      |
| 359        | M   | 50,00                    | 47,00                                        | untreated | 61,6                             | 0         | n.d.     | del13q           | ↓     | ↓    | ↑    | 0,97      |
| 366        | M   | 66,00                    | 43,00                                        | treated   | 70,3                             | 2         | M        | del11q           | ↓     | ↓    | ↓    | 0,53      |
| 386        | M   | 46,00                    | 48,00                                        | untreated | 56,6                             | 0         | M        | normal           | ↓     | ↓    | ↓    | 0,91      |
| 399        | F   | 76,00                    | 60,00                                        | untreated | 74,3                             | 0         | M        | normal           | ↓     | ↑    | ↓    | 0,56      |
| 411        | F   | 72,00                    | 48,00                                        | treated   | 60,3                             | 0         | UM       | del13q           | n.d.  | ↓    | ↑    | 0,55      |
| 419        | M   | 69,00                    | 38,00                                        | untreated | 51,6                             | 1         | M        | del13q           | ↓     | ↓    | ↓    | 0,45      |
| 422        | F   | 43,00                    | 34,00                                        | untreated | 70,7                             | 0         | M        | normal           | ↑     | ↓    | ↓    | 17,97     |
| 435        | F   | 60,00                    | 7,00                                         | treated   | 43,6                             | 2         | M        | del13q           | ↓     | ↓    | ↓    | 12,8      |
| 442        | M   | 61,00                    | 50,00                                        | untreated | 59,6                             | 0         | M        | del13q           | ↓     | ↑    | n.d. | 0,03      |
| 447        | M   | 68,00                    | 56,00                                        | untreated | 67,6                             | 0         | M        | del13q           | ↓     | ↓    | ↓    | 0,18      |
| 453        | M   | 66,00                    | 39,00                                        | untreated | 49,2                             | 1         | n.d.     | del11q 13q       | ↑     | ↑    | ↓    | 1,19      |
| 456        | M   | 66,00                    | 9,00                                         | treated   | 20,8                             | 1         | UM       | del11q           | ↑     | ↑    | ↓    | 0,08      |
| 485        | M   | 60,00                    | 123,00                                       | untreated | 130,7                            | 0         | n.d.     | del13q           | ↓     | ↓    | ↓    | 1,37      |
| 489        | M   | 81,00                    | 36,00                                        | untreated | 49,6                             | 0         | n.d.     | del11q 13q       | ↑     | ↓    | ↓    | 5,3       |
| 496        | M   | 69,00                    | 31,00                                        | untreated | 44,6                             | 1         | M        | normal           | ↓     | ↓    | ↓    | 1,72      |
| 501        | F   | 65,00                    | 3,00                                         | treated   | 3,3                              | 0         | UM       | normal           | ↑     | ↑    | n.d. | 1,54      |
| 503        | M   | 47,00                    | 60,00                                        | untreated | 67,6                             | 0         | n.d.     | del11q 13q       | ↑     | ↓    | n.d. | 0,04      |
| 518        | F   | 77,00                    | 23,00                                        | untreated | 35,6                             | 0         | n.d.     | normal           | ↑     | ↑    | n.d. | 0,48      |
| 530        | M   | 80,00                    | 7,00                                         | treated   | 21,3                             | 0         | n.d.     | del11q 13q       | ↑     | ↑    | ↓    | 3,51      |
| 537        | F   | 67,00                    | 122,00                                       | untreated | 130,7                            | n.d.      | UM       | del13q           | ↓     | ↓    | n.d. | 0,37      |
| 560        | M   | 66,00                    | 8,00                                         | untreated | 20,6                             | 1         | n.d.     | del13q           | ↓     | ↓    | n.d. | 2,68      |
| 564        | F   | 72,00                    | 88,00                                        | untreated | 100,6                            | n.d.      | n.d.     | n.d.             | n.d.  | n.d. | n.d. | 4,29      |
| 565        | M   | 60,00                    | 12,00                                        | untreated | 23,7                             | 0         | n.d.     | del13q           | n.d.  | n.d. | n.d. | 0,17      |
| 577        | M   | 60,00                    | 86,00                                        | treated   | 93,6                             | n.d.      | M        | del13q           | ↑     | ↑    | ↑    | 1,91      |
| 578        | F   | 59,00                    | 24,00                                        | untreated | 31,9                             | 0         | n.d.     | del13q           | ↓     | ↓    | n.d. | 0,64      |
| 582        | F   | 68,00                    | 17,00                                        | untreated | 24,7                             | 1         | n.d.     | normal           | ↓     | ↓    | n.d. | 0,15      |
| 587        | M   | 74,00                    | 46,00                                        | untreated | 57,6                             | 0         | n.d.     | n.d.             | n.d.  | n.d. | n.d. | 0,5       |
| 594        | F   | 61,00                    | 8,00                                         | treated   | 8,6                              | 1         | n.d.     | n.d.             | ↑     | ↑    | ↓    | 0,21      |
| median     |     | 66,0                     | 48,0                                         |           | 66,8                             |           |          |                  |       |      |      | 1,3       |
| ±SD        |     | 8,7                      | 41,0                                         |           | 40,6                             |           |          |                  |       |      |      | 4,1       |

patients included in CXCR4 CD86 statistics (Fig 2)

n.d.=not determined

| Patient ID | Mut status | Zytogenetics     | Zap70 | CD38 | VLA4 | Therapy   |
|------------|------------|------------------|-------|------|------|-----------|
| 2          | M          | del13q           | ↓     | ↓    | ↓    | treated   |
| 14         | M          | del13q           | ↓     | ↓    | ↑    | treated   |
| 23         | n.d.       | del17p           | n.d.  | ↑    | ↓    | treated   |
| 45         | M          | del13q           | ↓     | ↓    | ↓    | treated   |
| 60         | M          | del13q           | ↓     | ↓    | ↓    | treated   |
| 61         | M          | del13q           | ↓     | ↓    | ↓    | treated   |
| 72         | n.d.       | del13q           | ↓     | ↓    | ↓    | untreated |
| 75         | M          | del13q           | ↓     | ↓    | ↓    | treated   |
| 106        | M          | normal           | n.d.  | ↓    | ↓    | untreated |
| 108        | M          | del13q           | ↓     | ↓    | ↓    | untreated |
| 109        | M          | Tri12            | ↓     | ↓    | ↑    | untreated |
| 116        | M          | del13q           | ↓     | ↓    | n.d. | untreated |
| 123        | M          | del13q           | ↓     | ↓    | ↓    | untreated |
| 137        | UM         | Tri12            | ↑     | ↑    | ↑    | untreated |
| 158        | M          | del13q           | ↓     | ↓    | ↓    | untreated |
| 200        | UM         | del13q           | ↑     | ↑    | ↑    | treated   |
| 232        | M          | del13q 17p       | n.d.  | ↓    | n.d. | untreated |
| 240        | UM         | normal           | ↑     | ↓    | n.d. | treated   |
| 279        | M          | normal           | ↓     | ↓    | ↑    | untreated |
| 283        | M          | del11q           | ↑     | ↓    | ↓    | treated   |
| 308        | M          | normal           | ↓     | ↓    | ↓    | treated   |
| 319        | M          | del13q           | ↓     | ↓    | ↓    | untreated |
| 321        | UM         | del13q 17p Tri12 | ↑     | ↑    | ↑    | treated   |
| 359        | n.d.       | del13q           | ↓     | ↓    | ↑    | untreated |
| 366        | M          | del11q           | ↓     | ↓    | ↓    | treated   |
| 386        | M          | normal           | ↓     | ↓    | ↓    | untreated |
| 399        | M          | normal           | ↓     | ↑    | ↓    | untreated |
| 419        | M          | del13q           | ↓     | ↓    | ↓    | untreated |
| 422        | M          | normal           | ↑     | ↓    | ↓    | untreated |
| 435        | M          | del13q           | ↓     | ↓    | ↓    | untreated |
| 447        | M          | del13q           | ↓     | ↓    | ↓    | untreated |
| 453        | n.d.       | del11q 13q       | ↑     | ↑    | ↓    | untreated |
| 456        | UM         | del11q           | ↑     | ↑    | ↓    | treated   |
| 467        | UM         | del13q 17p       | ↑     | ↑    | n.d. | treated   |
| 485        | n.d.       | del13q           | ↓     | ↓    | ↓    | untreated |
| 489        | n.d.       | del11q 13q       | ↓     | ↓    | ↓    | untreated |
| 496        | M          | normal           | ↓     | ↓    | ↓    | untreated |
| 503        | n.d.       | del11q 13q       | ↑     | ↓    | n.d. | untreated |
| 518        | n.d.       | normal           | ↑     | ↑    | n.d. | untreated |
| 530        | n.d.       | del11q 13q       | ↑     | ↑    | ↓    | treated   |
| 531        | n.d.       | del13q           | ↑     | ↓    | ↓    | untreated |
| 537        | UM         | del13q           | ↓     | ↓    | n.d. | untreated |
| 560        | n.d.       | del13q           | ↓     | ↓    | n.d. | untreated |
| 564        | n.d.       | n.d.             | n.d.  | n.d. | n.d. | untreated |
| 565        | n.d.       | del13q           | n.d.  | n.d. | n.d. | untreated |
| 577        | n.d.       | del13q           | ↑     | ↑    | n.d. | untreated |
| 578        | n.d.       | del13q           | ↓     | ↓    | n.d. | untreated |
| 582        | n.d.       | normal           | ↓     | ↓    | n.d. | untreated |
| 587        | n.d.       | n.d.             | n.d.  | n.d. | n.d. | untreated |
| 594        | n.d.       | n.d.             | ↑     | ↑    | n.d. | treated   |



patients included in Ki67 CD86 statistics (Fig 2)

n.d.=not determined

| Patient ID | Mut status | Zytogenetics     | Zap70 | CD38 | VLA4 | Therapy   |
|------------|------------|------------------|-------|------|------|-----------|
| 2          | M          | del13q           | ↓     | ↓    | ↓    | treated   |
| 23         | n.d.       | del17p           | n.d.  | ↑    | ↓    | treated   |
| 45         | M          | del13q           | ↓     | ↓    | ↓    | treated   |
| 61         | M          | del13q           | ↓     | ↓    | ↓    | treated   |
| 72         | n.d.       | del13q           | ↓     | ↓    | ↓    | untreated |
| 116        | M          | del13q           | ↓     | ↓    | n.d. | untreated |
| 151        | M          | del13q           | ↓     | ↓    | ↓    | untreated |
| 187        | UM         | del13q           | ↓     | ↑    | ↑    | treated   |
| 200        | UM         | del13q           | ↑     | ↑    | ↑    | treated   |
| 240        | UM         | normal           | ↑     | ↓    | n.d. | treated   |
| 264        | M          | del13q           | ↑     | ↑    | ↑    | untreated |
| 279        | M          | normal           | ↓     | ↓    | ↑    | untreated |
| 283        | M          | del11q           | ↑     | ↓    | ↓    | treated   |
| 289        | M          | normal           | ↓     | ↓    | ↓    | untreated |
| 293        | UM         | normal           | n.d.  | ↑    | ↓    | untreated |
| 321        | UM         | del13q 17p Tri12 | ↑     | ↑    | ↑    | treated   |
| 359        | n.d.       | del13q           | ↓     | ↓    | ↑    | untreated |
| 366        | M          | del11q           | ↓     | ↓    | ↓    | treated   |
| 386        | M          | normal           | ↓     | ↓    | ↓    | untreated |
| 422        | M          | normal           | ↑     | ↓    | ↓    | untreated |
| 442        | M          | del13q           | ↓     | ↑    | n.d. | untreated |
| 447        | M          | del13q           | ↓     | ↓    | ↓    | untreated |
| 453        | n.d.       | del11q 13q       | ↑     | ↑    | ↓    | untreated |
| 456        | UM         | del11q           | ↑     | ↑    | ↓    | treated   |
| 467        | UM         | del13q 17p       | ↑     | ↑    | n.d. | treated   |
| 485        | n.d.       | del13q           | ↓     | ↓    | ↓    | untreated |
| 489        | n.d.       | del11q 13q       | ↓     | ↓    | ↓    | untreated |
| 496        | M          | normal           | ↓     | ↓    | ↓    | untreated |
| 503        | n.d.       | del11q 13q       | ↑     | ↓    | n.d. | untreated |
| 531        | n.d.       | del13q           | ↑     | ↓    | ↓    | untreated |
| 537        | UM         | del13q           | ↓     | ↓    | n.d. | untreated |
| 564        | n.d.       | n.d.             | n.d.  | n.d. | n.d. | untreated |
| 565        | n.d.       | del13q           | n.d.  | n.d. | n.d. | untreated |
| 577        | n.d.       | del13q           | ↑     | ↑    | n.d. | untreated |
| 578        | n.d.       | del13q           | ↓     | ↓    | n.d. | untreated |
| 582        | n.d.       | normal           | ↓     | ↓    | n.d. | untreated |
| 587        | n.d.       | n.d.             | n.d.  | n.d. | n.d. | untreated |
| 594        | n.d.       | n.d.             | ↑     | ↑    | n.d. | treated   |

patient samples used for H2AX staining (Fig 4)

n.d.=not determined

| Patient ID | Sex | age at diagnosis (years) | Time between diagnosis and sampling (years) | treatment         | Rai stage | Mut stat | Zytogen    | Zap70 | CD38 | VLA-4 |
|------------|-----|--------------------------|---------------------------------------------|-------------------|-----------|----------|------------|-------|------|-------|
| 210        | F   | 57                       | 11.48                                       | untreated         | 0         | M        | Del13q     | ↓     | ↓    | ↓     |
| 36         | F   | 47                       | 15.42                                       | 2001: Fludarabine | 2         | n.d.     | n.d.       | ↓     | ↑    |       |
| 489        | M   | 81                       | 4.67                                        | untreated         | n.d.      | M        | Del11q 13q | ↓     | ↓    | ↓     |
| 338        | M   | 63                       | 5.93                                        | untreated         | 0         | M        | Del13q     | ↓     | ↓    | ↓     |

patient samples used for DAPI analysis (Fig 2)

n.d.=not determined

| Patient ID | Sex | age at diagnosis (years) | Time between diagnosis and sampling | treatment | Rai stage | Mut stat | Zytogen    | Zap70 | CD38 | VLA-4 |
|------------|-----|--------------------------|-------------------------------------|-----------|-----------|----------|------------|-------|------|-------|
| 472        | F   | 72                       | 57                                  | untreated | 0         | M        | del13q     | ↓     | ↓    | ↑     |
| 565        | M   | 60                       | 21                                  | untreated | 0         | UM       | del13q     | ↑     | ↑    | ↓     |
| 13         | M   | 76                       | 111                                 | untreated | 1         | M        | del13q 17p | ↓     | ↓    | ↓     |
| 262        | M   | 62                       | 83                                  | untreated | 1         | M        | del13q     | ↓     | ↓    | ↑     |
| 417        | M   | 79                       | 65                                  | untreated | 0         | n.d.     | del13q     | ↑     | ↑    | ↓     |

Supporting Information Table 2. Primer list

| ID Fig. 1  | Patient ID | Lab-internal sample ID | primer 1st round | sequence 5'-3'                | amplified region | primer 2nd round | sequence 5'-3'                     | amplified region |
|------------|------------|------------------------|------------------|-------------------------------|------------------|------------------|------------------------------------|------------------|
| IgV-UM #1  | ID: 149    | 3157                   | fwd RG686        | gtcctgtcccagctgcagctgcaggag   | V-S $\mu$        | fwd RG698        | AATCGgtcctgtcccagctgcagctgcaggag   | VDJ              |
|            |            |                        | rev Spl9         | AAA AAT GAG CAG GTC CCC TT    |                  | rev RG699        | AATCGGAGAAAACAAGGCCCTAGAG          |                  |
| IgV-UM #2  | ID: 337    | 7805                   | fwd RG687        | tgccagtgctcaggtgcagctggggag   | V-S $\mu$        | fwd RG702        | TGAGCAGtccaggtgcaggtgcagctggggag   | VDJ              |
|            |            |                        | rev Spl9         | AAA AAT GAG CAG GTC CCC TT    |                  | rev RG703        | TGAGCAACCCCTCAGAGTTAAAGCAGGAG      |                  |
| IgV-Mut #3 | ID: 154    | 4663                   | fwd RG691        | ggtgattcatggagaatagagagattgag | V-S $\mu$        | fwd RG706        | GTCTAGgtgattcatggagaatagagagattgag | VDJ              |
|            |            |                        | rev Spl9         | AAA AAT GAG CAG GTC CCC TT    |                  | rev RG707        | GTCTAGCAGAAAACAAGGCCCTAGAG         |                  |
| IgV-Mut #4 | ID: 283    | 4788                   | fwd RG688        | CAGCAGCTACAggtaagggcttc       | V-S $\mu$        | fwd RG718        | taagacAGCAGCTACAggtaagggcttc       | VDJ              |
|            |            |                        | rev Spl9         | AAA AAT GAG CAG GTC CCC TT    |                  | rev RG719        | taagacAACCCCTCAGAGTTAAAGCAGGAG     |                  |
| IgV-Mut #4 | ID: 283    | 4788 CD86 sorted       | fwd RG691        | ggtgattcatggagaatagagagattgag | V-S $\mu$        | fwd RG714        | agtcctgtgattcatggagaatagagagattgag | VDJ              |
|            |            |                        | rev Spl9         | AAA AAT GAG CAG GTC CCC TT    |                  | rev RG715        | agtcctGCAGAAAACAAGGCCCTAGAG        |                  |
| IgV-Mut #4 | ID: 283    | 4788 CD86 sorted       | fwd RG688        | CAGCAGCTACAggtaagggcttc       | V-S $\mu$        | fwd RG726        | ctgaggCAGCAGCTACAggtaagggcttc      | VDJ              |
|            |            |                        | rev Spl9         | AAA AAT GAG CAG GTC CCC TT    |                  | rev RG727        | ctgaggAACCCCTCAGAGTTAAAGCAGGAG     |                  |
